# Supplementary material for: The Molecular Evolution of the Qo Motif
Source: PubMed Central journal article supplement — Genome Biol Evol. 2014 Jul 22;6(7):1894–910. doi: 10.1093/gbe/evu147 (PMC4122944; doi:10.1093/gbe/evu147), 2014-07-22
Supplement: supp_evu147_Supplementary_Materials_Revised.pdf [file supp_evu147_Supplementary_Materials_Revised.pdf]

# **Supplementary Information**

## The molecular evolution of the Qo motif

Wei-Chun Kao and Carola Hunte\*

---

\*To whom correspondence should be addressed ([carola.hunte@biochemie.uni-freiburg.de](mailto:carola.hunte@biochemie.uni-freiburg.de))

# Supplementary FIG. S1

The molecular evolution of the Qo motif. Kao, WC and Hunte, C

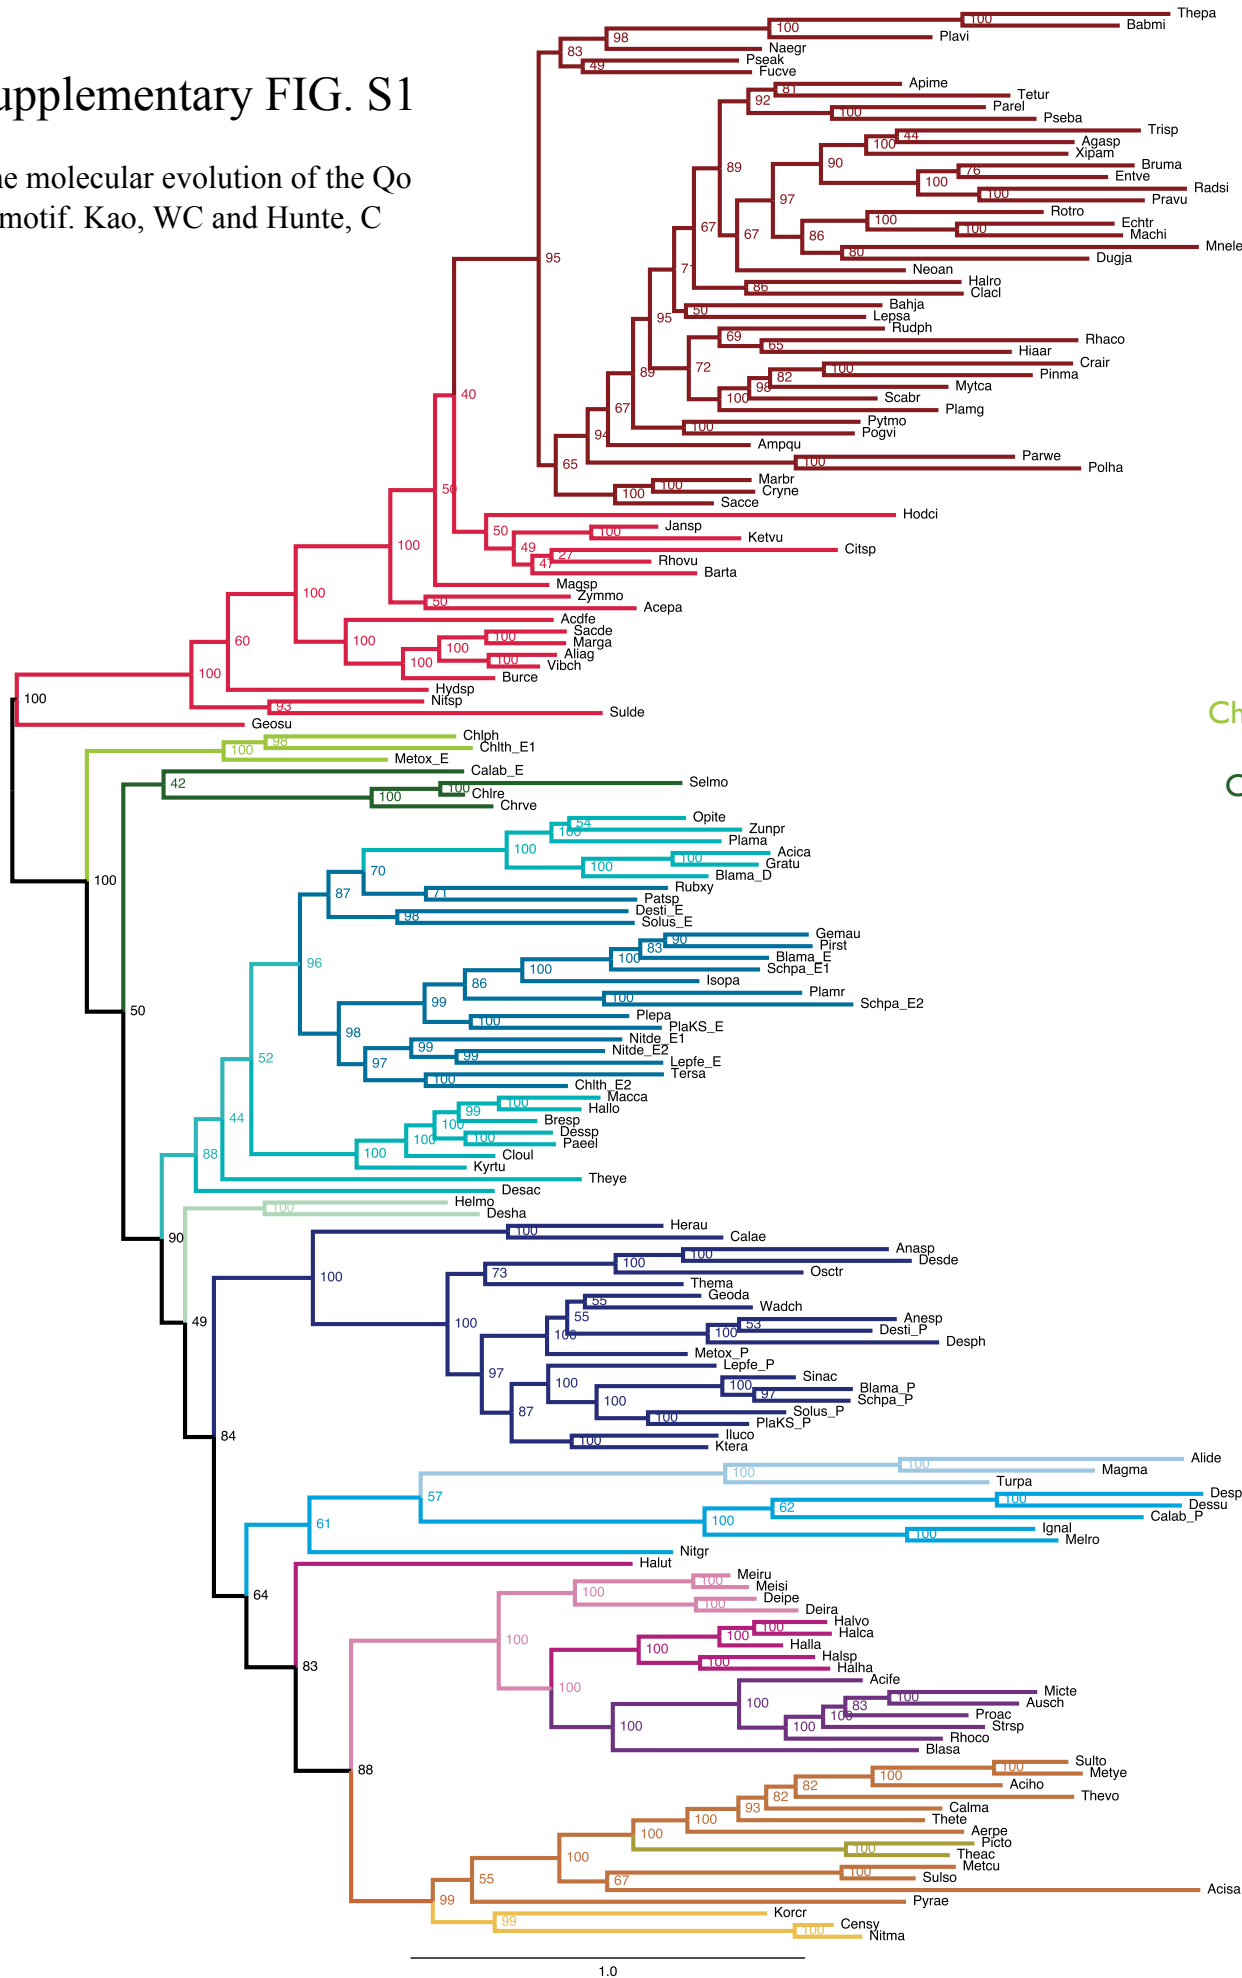

Mitochondria (PEWY)  
Table S3

Proteobacteria (PEWY)  
Table S4

Chlorobi, NC10, Acidobacteria (PEWY)  
Table S5

Chloroplasts, Cyanobacteria (PEWY)  
Table S5

mixed taxa (PDWY-cyt c)  
Table S6

mixed taxa (PEWY-cyt c)  
Table S6

Heliobacteria (PEWY)  
Table S5

mixed taxa (APWY)  
Table S7

mixed taxa (PDWF-FeS)  
mixed taxa (GPWY)  
Table S8

Deinococcus-Thermus (PDWY)  
Haloarchaea (PDWY, PDWF)  
Actinobacteria (PDWY)  
Table S9

Thermoprotei (PDWY, PPWF)  
Thermoplasma (PDWY, PPWF)  
Thaumarchaeota (PEWY)  
Table S10

**Supplementary FIG. S 1:** See previous page for the figure. The Bayesian inference tree of *cyt b*. The phylogenetic tree of **fig. 4** is represented in the midpoint-rooted, rectangular layout, showing all tip labels and branching probabilities (in percentage). The representative lineages and Qo motifs are noted next to each clade. Detailed descriptions of individual branches are described from **supplementary table S3** to **table S10**.

|         |                                                               |
|---------|---------------------------------------------------------------|
| Selmo   | EERPEIQSIA---DDITSKHV---P-PH-----VNTPHRLGGITPTCFPVQVA         |
| Helmo   | ERMPGIGRIA---KDIAEHPV---P-SHT-----LNIFYCLGGITLLCFIIQCL        |
| Chrve   | NKRIGLNKLA---EDFSTKFV---P-PH-----VNIFYCLGGITFISLLIQIA         |
| Theye   | DRF-RLKSTH---RGIFDRDI---P-EG-----INIFYCFGGIAFTAFLICLV         |
| Macca   | DRL-DITPIW---RDIADHEV---P-EHVNPAYHF-----SAFVYCFGGITFFITVIQVL  |
| Kyrtu   | ERL-NVTPIW---RDIADYDV---P-AHVNPANKM-----SAFVYCFGGITFLIIVTQIL  |
| Hallo   | ERV-DITPLW---RDIADHEV---P-EHVNPAHHF-----SAFVYCFGGITFFITVIQIL  |
| Dessp   | QRL-DITPMW---RDLADHEV---P-EHVNPAHHF-----SAFYCFGGITFFIVVIQIL   |
| Paeel   | ERL-DITPMW---RDVADHEV---P-EHVNPAHHF-----SAFVYCFGGITFFITVIQIL  |
| Bresp   | ERL-NITPMW---RDLADHEV---P-EHVNPAHHF-----SAFVYCFGGITFFITVIQIL  |
| Cloul   | ERL-DLTPLW---RDVADHEV---P-EHVNPAHHF-----SAFVYCFGGITFFIVVIQIL  |
| Geoda   | PEQEQAANVF---GNVFLHLH---P-VRVHVNALR-----PGYTLGLGLISFYFLILVL   |
| Halut   | DKRLRIVDYLEILEGLYYKVNMQPKSHTEQYGLDNKFWYWYPLYALGSFSTLAYIVAAI   |
| Ketvu   | ES--RLPVI-GFGRRFMLTPT---P-RN-----LNWMWIWGMVLVFTLVMQMA         |
| Thema   | DRRTRGLAVL---NSLFLHLH---P-GRITRQALT-----FRYTFGLGGTSFFMFILLTV  |
| Lepfe_P | NELNQAYVVF---SNIFLHIH---P-VKVRRTALR-----MRYTFCLGGITLFLFIMLAV  |
| Iluco   | SPRNRSYVIM---NSVLYHLH---P-VKVKRHAVK-----VSYTLCLGGLSFFLFILLTV  |
| Desha   | PKEVGVKDMF---KEIAEHPV---P-RHA-----RNFIFCFGGISFLLFLVQVV        |
| Sinac   | DRNRNVVML---TNFFLHLH---P-VSVRKQOGIA-----LSYTWCMGGITFFLFIVEVV  |
| Solus_P | TPRSRALGVL---SNVFLHLH---P-AKINRDAVA-----YNYTWGMGGMTFFVYITLVF  |
| Blama_P | DRNRNIVVVL---TNFFLHLH---P-VSVKQOGIA-----LSYTWCMGGVTFFLFLVEAV  |
| Ktera   | TPLNQSLVMM---GNVFLHLH---P-VKVSROAMK-----ITYTWCMGGISFFLFLLLTI  |
| PlaKS_P | TPKNRMLKIV---SNVFMHLH---P-AKVKRHAPO-----LKFTWCMGGISFFLFLVLTTF |
| Schpa_P | DRNRNIVVML---TNFFLHLH---P-VSIKQOGIA-----LSYTWCMGGITFFFLVETI   |
| Rubxy   | NRT-GIVTAL---EHFLYEPV---P-KR-----GAWLYTLGSATLFLITLQFL         |
| Vibch   | EK--RLPAMNAYKKHLSEYPM---P-KN-----FNFWYLFGLSLAMLVLVNQLL        |
| Patsp   | ERT-SLSGTV---RWVMFRPI---P-KG-----TNWFYTLGTATMVAFINQVI         |
| Sacce   | KS--NVYLS-LVNSYIIDSPQ---P-SS-----INYWNNMGSLGLCLVIQIV          |
|         | . * *                                                         |

**Supplementary FIG. S 2:** Multiple sequence alignment of all *cyt b* N-terminal proteins from COB\_50, with *cyt b* of *S. cerevisiae*. The column containing the potential heme  $c_i$  binding motif (CxGG) and its upstream amino acid are highlighted according to their specific patterns. *Cyt b* from photosynthetic organisms: green (**supplementary table S 5**); *cyt b* clustered PEWY-*cyt c* and PDWY-*cyt c* clades: blue-green (**supplementary table S 6**); *Cyt b* from Planctomycetes and Chloroflexi in the APWY clade: blue (**supplementary table S 7**); others: brown (**supplementary table S 7, S 5**).

```

NP_559242      PGMQVIEIPTSA LMPWDKLYLYGEEV PPTLKATQSYVSVYTI TYLTPFGFVLRQFHLWAA
YP_001056794  PSLDVRQIPASA IMKWDQLYGV E---GGEVSATGSYLSVYKIVYLTPFGFILRQFHLWAA
YP_005260411  PGMVAVKEVPTSA LMPWDV LHPK---KTETVQATQSYLSVYTI TYLTPFGFVLRQFHLWAA
YP_005084460  PGVSTTVKTPPDI -----LSGHAAAESYVATQSYG SVYRIVYLTPPLGFVIREIHLWAA
YP_004337861  PGVTPTYTIQT-----LGGSAEVSQS YSYSVYKIA YLTPPLGFILREIHLWAA
NP_009315     SNIELAFS-----SVEHIMRDVHNGYIL RYLHANGA
                :                               ** * . *:::* :* . *

NP_559242      YLMIFAALVHFFAKFV LGSYKRKGGGALW LIGVLLGFLTISQAVLGYILPLHLDGILALM
YP_001056794  YLMIMAALVHFFAKFV LGSYKRKGGGALW LFGVLLGVLTINQAVLGYILPLHLDGILALM
YP_005260411  YMMIMAAFVHFFAKFV LGSYKRKGGGALW LFGVLLGFLTINQAVLGYILPLHLDGILALL
YP_005084460  YMMIFATLAHFFAKF LILGSYKRKGGGALW LFGVLLGFLTINQAVLGYILPLHLDGILALQ
YP_004337861  YMMVFAAITHFFAKFV LGSYKRKGGGALW LFGVLLGVLTVTQAVLGYILPLHLDGALALQ
NP_009315     SFFFMVMFMHMAKGL YYGSYRS-PRVTLWNVGV IIFILTIATAFLGYCCVYGOMSHWGAT
                : : . . . : * : : * : * : : * * : * : * : * : * : * : * : * : *

NP_559242      IGLNLF RYFDYIGIPVGGAI IALMGSNYPTDA VVKIIYVAHIL----IVPAI ILLVLLK
YP_001056794  IGLNLF RYFDYLGI PVGGTIIALLGSNYPTNE VVKMYYVHLI L----IVPAV ILLGLK
YP_005260411  IGLNLF RYFDYIGIPVGG LIIALLGSNYPTDA VIKMIYVAHIL----VVP AI ILLGLK
YP_005084460  IGLNIF RYFDYLGI PVGQLILALLGSNFVTDQ VIKI IYSLHIL----IVPAV ILLVLLGLK
YP_004337861  IGLNIF RYLEYFGVPV GQVVSVL GSTFITSGIMKDI YTLHVL----VVP AI ILLVLLGLK
NP_009315     VITNLFSAIPFVGN DIVS---WLWGGF SVSNPTIQRF ALHYLV PFI IAAMVIMHLMALH
                : * : * : : * : : * . : . : : : * * : . : * : * : *

NP_559242      IQGILYGGVSP PPVKNEEIRRKMVEDKEPFY PHRFALM--VGQVFLQIS LLLLLLVAFFPL
YP_001056794  IQGILYGGVSP PPVKNEALRQKMVEDKEPFY PHRFALM--VGQVFLQIS FLLLLLVAFFPQ
YP_005260411  IQGILYGGVSP PPVRDQELAKKMVDDKEPFY PHRFALM--TGQVFLQIS LLLLLLVAFFPQ
YP_005084460  INGILYGGVSP PPVKDPAVREKALQEKEPFY PHRFALT--VGQLFLQLSV LLLLLVAVFPL
YP_004337861  INGILYGGVSP PPPTKNNAARERALAETEPFY PHRFALT--VGQLLQLSV LLLLLVAVFPO
NP_009315     IHG-----SSNPLGITGN LDR-----IPM--HSYFI FKDLVTVFLF MLILALFV FYSNP
                * . *      * *      .      * : * : :      : : * : * * *

NP_559242      PL--LEPWAPGEPV--PPGVRPPWPVMWYYTYVKMIDPF- ISVGLPIV LVLVLFALV VPLLD
YP_001056794  PL--LEPWAPGQGV--PTGVRPPWPVMWYYTYVKMIDPF- ISVGLPFL LVLVLFALV VPLLD
YP_005260411  PL--LEPWAPGEIV--PAGVRPPWPVMWYYTYVKMIDPF- ISVGIP IIMVLFALV VPLLD
YP_005084460  PL--LEPWLPGQPV--PAGVRPPWPVMWYYTYVKMIDPF- ISVGLPFL VLVLFALV VPLLD
YP_004337861  PL--LEPWLPGQPV--PSGVRPPWPVEWYYTYVKAINPF- ISVGIP IFMVLFALIV PLID
NP_009315     TLGHPDNYIPGNPLVTPASIVPEWYLLPFYAILRSIPDKLLGVITMFAAILVLLVLPFTD
                * : : * : : * . : * * : : * : : * : * : * : * : * : *
    
```

**Supplementary FIG. S 3:** Multiple sequence alignment of *Pyrobaculum* *cyt b* homologs, with *cyt b* of *S. cerevisiae*. The column containing the conserved three axial ligands of heme *b* are highlighted in blue, and the amino acids aligned to the fourth axial ligand of *S. cerevisiae* are highlighted in pink. The Qo motif is colored in brown. List of organisms: NP\_559242: *Pyrobaculum aerophilum* str. IM2; YP\_001056794: *Pyrobaculum calidifontis* JCM 11548; YP\_005260411: *Pyrobaculum oguniense* TE7; YP\_005084460: *Pyrobaculum* sp. 1860; YP\_004337861: *Thermoproteus uzoniensis* 768-20; NP\_009315: *S. cerevisiae*.

```

YP_002512829    YYSVKDIVGVGVFLILFFAVVFFAPEAGGYFLKAANFVKSDPLVTPDFIPPVWYYGAFYT
YP_003461444    YYTVKDIVGVGVFLMVFAVIMFFFFPMGGGLFLKPDNMIPADPLVTPDLIPPVWYFTSMYS
YP_007217743    YYTVKDLVGVGVFFIAFFAVVFFAPEMGGFLFKPANMIPADPLVTPDLIPPVWYFTSFYS
YP_743042       YYTVKDLVGVGVFLIVFSVVVFFIPEVGGYFIKYDNFIPADPLTTPSHIPPVWYFAPHYA
ZP_08929533     YYTVKDLVGVGVFLIAFFAVVFFAPEMGGFLFKPANMIPADPLVTPDLIPPVWYFTSFYS
NP_230225       YGTVKDLIGVAGFLFLFCYVLFNPEMGGYFLEPPNFEEANPLKTPEHIAPVWYFTPFYA
NP_253120       YYTVKDIVGVVVFLFIFCTVIFFFPEMGGYFLEKPNFEMANQFKTPEHIAPVWYFTPFYA
NP_275042       YYVVDILAVTIFLIVFCVMFFAPEGGYFLEAPNFDAANALKTTPHIA PVWYFTPFYA
NP_298199       YYTLKEMVAVCVLLLLAAFVIFFAPEFGGLFLEYGNFVEANPLMTPEDMKPVWYFAPYYA
NP_521049       YYSVHDIVGVAVFLFLFSAILFFAPEMGGYFLEANNFIPADSLKTPPHIAPVWYFTPFYS
NP_637677       YYTVKDLVGVGFLLVIAAFIIFFAPAFGGLFLEHDFNTEANRLVTPEHIKPVWYYTPYYA
NP_009315       YFIFKDLVTVFLFMLILALFVVFYSPNTLG---HPDNYIPGNPLVTPASIVPEWYLLPFYA
*   .: : . . *   : : .   . : *   *   .   *   . :   : * *   : * * *   * :

```

**Supplementary FIG. S 4:** Multiple sequence alignment of selected  $\beta$ - and  $\gamma$ -proteobacteria and *S. cerevisiae* *cyt b* showing the Qo motif (highlighted in brown) and amino acids aligned to His253 of the yeast enzyme (highlighted in blue). 342 out of 350  $\beta$ -proteobacterial *cyt b*, and 590 out of 629  $\gamma$ -proteobacterial *cyt b* employ Glu253 (supplementary table S 1). Interestingly, five alkaliphilic strains use a lysine residue at the Glu253 equivalent position, which may facilitate proton transfer at high pH. List of organisms: YP\_002512829: *Thioalkalivibrio sulfidophilus* HL-EbGr7; YP\_003461444 : *Thioalkalivibrio* sp. K90mix; YP\_007217743: *Thioalkalivibrio nitratireducens* DSM 14787; YP\_743042: *Alkalilimnicola ehrlichii* MLHE-1; ZP\_08929533: *Thioalkalivibrio thiocyanoxidans* ARh 4; NP\_230225: *Vibrio cholerae* O1 biovar El Tor str. N16961; NP\_253120: *Pseudomonas aeruginosa* PAO1; NP\_275042: *Neisseria meningitidis* MC58; NP\_298199: *Xylella fastidiosa* 9a5c; NP\_521049: *Ralstonia solanacearum* GMI1000; NP\_637677: *Xanthomonas campestris* pv. *campestris* str. ATCC 33913; NP\_009315: *S. cerevisiae*.

BLASTP 2.2.27+

Query= gi|121591043|ref|ZP\_01678359.1| ubiquinol--Cytochrome c reductase, cytochrome B [*Vibrio cholerae* 2740-80]

Length=235

>ref|ZP\_23822384.1| cytochrome b family protein [*Vibrio cholerae* O1 str. 116063]  
Length=421

Score = 465 bits (1196), Expect = 5e-165, Method: Compositional matrix adjust.  
Identities = 229/229 (100%), Positives = 229/229 (100%), Gaps = 0/229 (0%)

|       |     |                                                              |     |
|-------|-----|--------------------------------------------------------------|-----|
| Query | 1   | MQALLDWEKRLPAMNAYKKHLSEYPMPKNFNFWYLFGLSLAMLVLVNQLLTGIWLTMNYV | 60  |
|       |     | MQALLDWEKRLPAMNAYKKHLSEYPMPKNFNFWYLFGLSLAMLVLVNQLLTGIWLTMNYV |     |
| Sbjct | 1   | MQALLDWEKRLPAMNAYKKHLSEYPMPKNFNFWYLFGLSLAMLVLVNQLLTGIWLTMNYV | 60  |
| Query | 61  | PSGEGAFASIEYIMRDVEYGWLLRYMHSTGASAFFVVVYLHMFRLIYGSYQKPRELLWI  | 120 |
|       |     | PSGEGAFASIEYIMRDVEYGWLLRYMHSTGASAFFVVVYLHMFRLIYGSYQKPRELLWI  |     |
| Sbjct | 61  | PSGEGAFASIEYIMRDVEYGWLLRYMHSTGASAFFVVVYLHMFRLIYGSYQKPRELLWI  | 120 |
| Query | 121 | FGMLIFLVLMAEAFMGYLLPWGQMSYWGAQVIISLFGAIPVIGDDTLWIRGDYVISGAT  | 180 |
|       |     | FGMLIFLVLMAEAFMGYLLPWGQMSYWGAQVIISLFGAIPVIGDDTLWIRGDYVISGAT  |     |
| Sbjct | 121 | FGMLIFLVLMAEAFMGYLLPWGQMSYWGAQVIISLFGAIPVIGDDTLWIRGDYVISGAT  | 180 |
| Query | 181 | LNRRFFALHVIALPIVLLLLIVLHILALHEVGSNNPDGIETKLPKGMGE            | 229 |
|       |     | LNRRFFALHVIALPIVLLLLIVLHILALHEVGSNNPDGIETKLPKGMGE            |     |
| Sbjct | 181 | LNRRFFALHVIALPIVLLLLIVLHILALHEVGSNNPDGIETKLPKGMGE            | 229 |

Query= gi|121591034|ref|ZP\_01678350.1| ubiquinol--cytochrome c reductase, cytochrome B [*Vibrio cholerae* 2740-80]

Length=147

>ref|ZP\_21092526.1| cytochrome b family protein [*Vibrio cholerae* HC-78A1]  
Length=421

Score = 299 bits (765), Expect = 2e-101, Method: Compositional matrix adjust.  
Identities = 146/147 (99%), Positives = 147/147 (100%), Gaps = 0/147 (0%)

|       |     |                                                             |     |
|-------|-----|-------------------------------------------------------------|-----|
| Query | 1   | MLFFNPEMGGYFLEPPNFEAANPLKTPEHIAPVWYFTPFYAILRAVPDKLLGVAMGASI | 60  |
|       |     | +LFFNPEMGGYFLEPPNFEAANPLKTPEHIAPVWYFTPFYAILRAVPDKLLGVAMGASI |     |
| Sbjct | 275 | VLFFNPEMGGYFLEPPNFEAANPLKTPEHIAPVWYFTPFYAILRAVPDKLLGVAMGASI | 334 |
| Query | 61  | VVLFLLPWLDRCKVRSYRYSKFHLFNIAQFTVSFIALGILGALPATPTYTLAQIFSLC  | 120 |
|       |     | VVLFLLPWLDRCKVRSYRYSKFHLFNIAQFTVSFIALGILGALPATPTYTLAQIFSLC  |     |
| Sbjct | 335 | VVLFLLPWLDRCKVRSYRYSKFHLFNIAQFTVSFIALGILGALPATPTYTLAQIFSLC  | 394 |
| Query | 121 | YFMFFVLLFFYSKNEATKPLPTRVITYK                                | 147 |
|       |     | YFMFFVLLFFYSKNEATKPLPTRVITYK                                |     |
| Sbjct | 395 | YFMFFVLLFFYSKNEATKPLPTRVITYK                                | 421 |

**Supplementary FIG. S 5:** BLAST result of the sequence of the N-terminal region (ZP\_01678359) and C-terminal region of cyt *b* (ZP\_01678350) of *Vibrio cholerae* 2740-80, showing the high identities to the full-length homologs from other strains of the same species.

Supplementary FIG. S6

The molecular evolution of the Qo motif. Kao, WC and Hunte, C

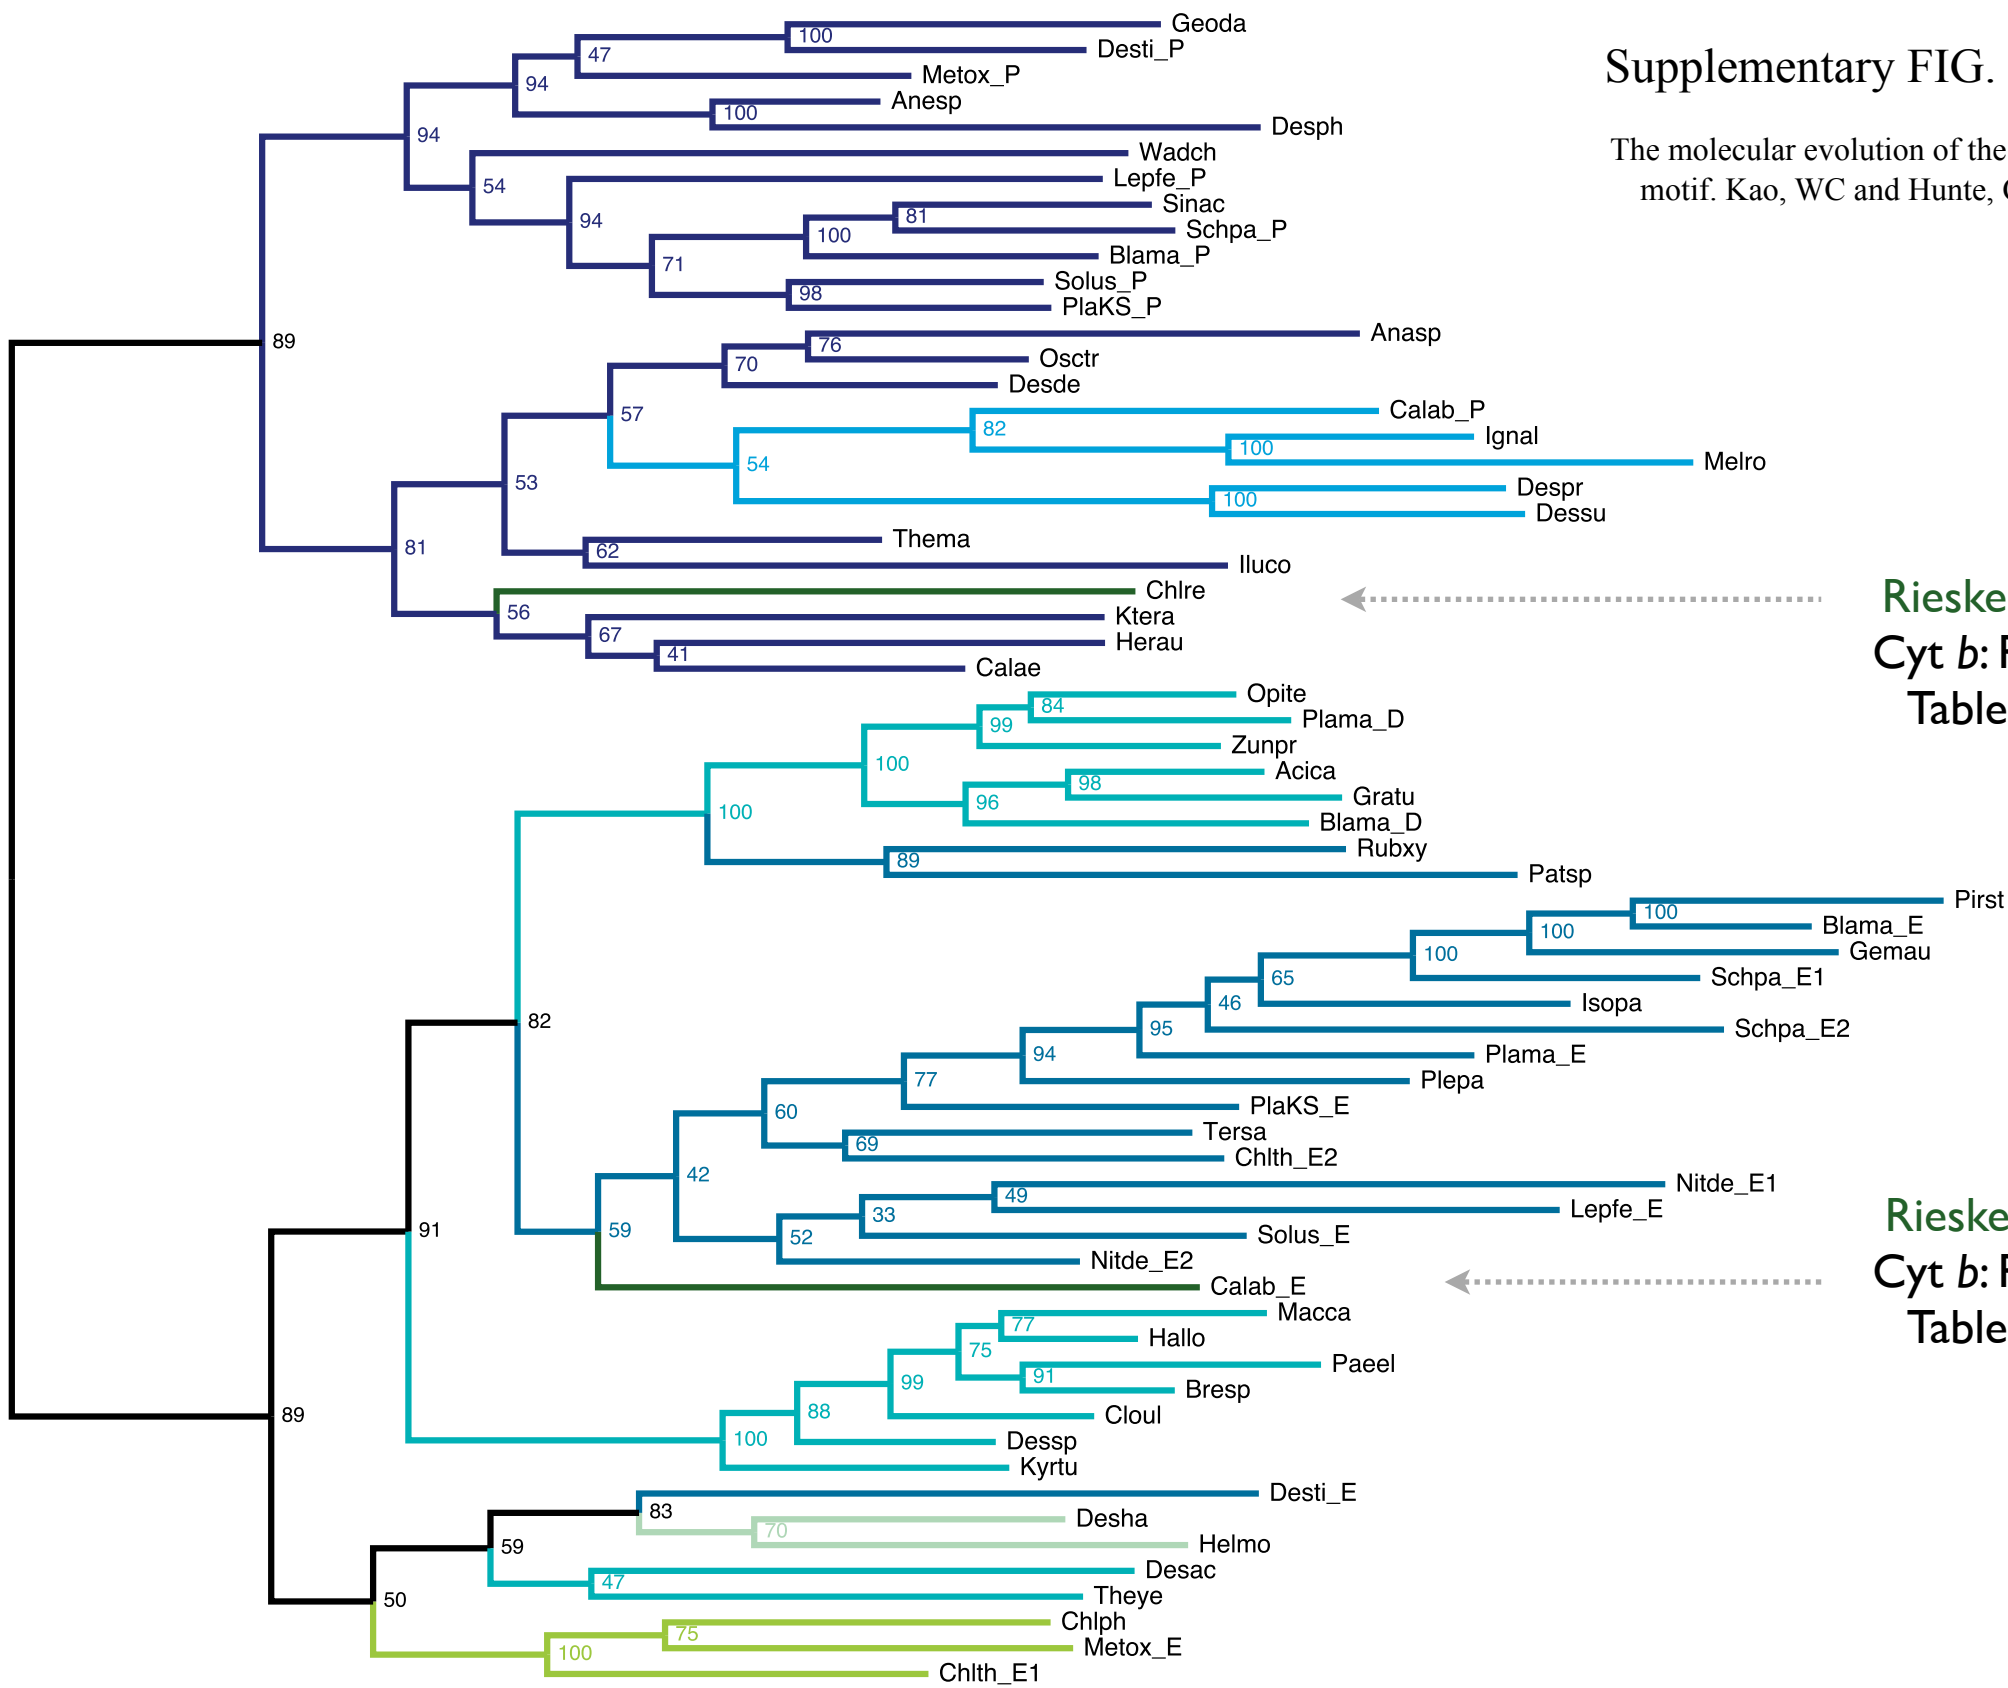

Rieske: Mid<sup>+</sup>, High  
Cyt *b*: APWY  
Table S13

Rieske: Mid<sup>+</sup>, High  
Cyt *b*: GPWF  
Table S13

Rieske: High  
Cyt *b*: PEWY  
Table S15

Rieske: Low, Mid<sup>-</sup>  
Cyt *b*: PDWY-cyt *c*  
Table S14

Rieske: Low, Mid<sup>-</sup>,  
Mid<sup>+</sup>, High  
Cyt *b*: PEWY-cyt *c*  
Table S15

Rieske: Low  
Cyt *b*: PEWY  
Table S15

Rieske: Low  
Cyt *b*: PDWY, PEWY  
Table S15

Rieske: Low  
Cyt *b*: PEWY  
Table S15

0.3

**Supplementary FIG. S 6:** See previous page for the figure. The Bayesian inference tree of Rieske iron-sulfur proteins. The phylogenetic tree in **fig. 6** is represented in the midpoint-rooted, rectangular layout, showing all tip labels and branching probabilities (in percentage). The predicted midpoint potential of Rieske ISP and the type of corresponding cyt *b* are annotated next to each clades. Low: 150 mV; Mid<sup>-</sup>: around 200 mV; Mid<sup>+</sup>: around 260 mV; High: above 260 mV. Detailed descriptions of individual branches are found from **supplementary table S13 to S15**.



**Supplementary Table S 1:** Lineage-specific occurrence of amino acid residues identified on His253 and Glu272 equivalent positions in all cyt *b* homologs identified: Organisms that encode full-length or split cyt *b*, but without cyt *b*<sub>6f</sub> complexes.

|                            | Full length cyt <i>b</i> |            |            |            |             |            |            |            |            |            | Split cyt <i>b</i> |     |   |      | TOTAL |
|----------------------------|--------------------------|------------|------------|------------|-------------|------------|------------|------------|------------|------------|--------------------|-----|---|------|-------|
|                            | Asp<br>Glu               | His<br>Glu | Glu<br>Glu | Glu<br>Val | Glu<br>all† | Glu<br>all | Asp<br>Pro | all<br>all | Glu<br>all | Asp<br>Pro | all<br>all         | Val |   |      |       |
| 253 Equivalent residue ▶   | <b>3231</b>              | 2          | 32         | 2          | -           | 29         | 2          | -          | 3          | -          | -                  | -   | - | 3301 |       |
| 272 Equivalent residue ▶   | <b>42</b>                | <b>74</b>  | 4          | -          | -           | -          | -          | -          | -          | -          | -                  | -   | - | 120  |       |
| <i>Metazoa</i>             | 1                        | 5          | -          | -          | -           | -          | -          | -          | -          | -          | -                  | -   | - | 6    |       |
| <i>Fungi</i>               |                          |            |            |            |             |            |            |            |            |            |                    |     |   |      |       |
| <i>Amoebozoa</i>           |                          |            |            |            |             |            |            |            |            |            |                    |     |   |      |       |
| <i>α-Proteobacteria</i>    | <b>28</b>                | <b>343</b> | <b>56</b>  | -          | -           | 18         | 2          | -          | 2          | 1          | -                  | -   | - | 450  |       |
| <i>ε-Proteobacteria</i>    | <b>395</b>               | -          | -          | -          | -           | -          | -          | -          | -          | -          | -                  | -   | - | 395  |       |
| <i>Aquificae</i>           | 4                        | -          | -          | -          | -           | 7          | -          | -          | -          | -          | -                  | -   | - | 11   |       |
| <i>β-Proteobacteria</i>    | -                        | -          | 1          | <b>342</b> | 5           | -          | 2          | -          | -          | -          | -                  | -   | - | 350  |       |
| <i>γ-Proteobacteria</i>    | -                        | -          | -          | <b>590</b> | 26          | 5          | -          | -          | 6          | -          | -                  | -   | - | 629  |       |
| <i>δ-Proteobacteria</i>    | -                        | -          | -          | -          | -           | <b>12</b>  | -          | <b>12</b>  | -          | -          | -                  | 3   | - | 27   |       |
| <i>Chlorobi</i>            | -                        | -          | -          | -          | -           | <b>12</b>  | -          | -          | -          | -          | -                  | -   | - | 12   |       |
| <i>Acidobacteria</i>       | -                        | -          | -          | -          | -           | <b>4</b>   | <b>5</b>   | <b>1</b>   | -          | -          | -                  | 1   | - | 11   |       |
| <i>Planctomycetes</i>      | -                        | -          | -          | -          | -           | <b>8</b>   | 2          | -          | -          | -          | -                  | 5   | - | 15   |       |
| <i>Nitrospirae</i>         | -                        | -          | -          | -          | -           | 2          | -          | 1          | 2          | 1          | -                  | 3   | - | 9    |       |
| <i>Chloroflexi</i>         | -                        | -          | -          | -          | -           | -          | 1          | 2          | 1          | -          | -                  | 1   | - | 5    |       |
| <i>Actinobacteria</i>      | -                        | -          | -          | -          | -           | -          | <b>613</b> | -          | -          | 4          | -                  | 1   | - | 618  |       |
| <i>Deinococcus-Thermus</i> | -                        | -          | -          | -          | -           | -          | <b>21</b>  | -          | -          | -          | -                  | -   | - | 21   |       |
| <i>Verrucomicrobia</i>     | -                        | -          | -          | -          | -           | -          | <b>3</b>   | -          | -          | -          | -                  | -   | - | 3    |       |
| <i>Thaumarchaeota</i>      | -                        | -          | -          | -          | -           | <b>9</b>   | -          | -          | -          | -          | -                  | -   | - | 9    |       |
| <i>Halobacteria</i>        | -                        | -          | -          | -          | -           | -          | <b>41</b>  | -          | 2          | -          | <b>62</b>          | -   | - | 105  |       |
| <i>Crenarchaeota</i>       | -                        | -          | -          | -          | -           | -          | <b>20</b>  | <b>52</b>  | 1          | -          | -                  | -   | - | 67   |       |
| <i>Thermoplasma</i>        | -                        | -          | -          | -          | -           | -          | <b>3</b>   | <b>2</b>   | -          | -          | -                  | -   | - | 5    |       |
| Other Organisms            | -                        | 11         | -          | 1          | -           | 4          | 2          | 9          | -          | 9          | -                  | -   | - | 36   |       |

**Supplementary Table S 2:** Lineage-specific occurrence of amino acid residues identified on His253 and Glu272 equivalent positions in all cyt *b* homologs identified: Organisms which encode cyt *b<sub>6f</sub>* complexes and/ or cyt *b<sub>c1</sub>* complexes.

|                      | Cyt <i>b<sub>c1</sub></i> complexes                  |            |            |            |            |                         |            |            |            |            | Cyt <i>b<sub>6f</sub></i> complexes |            |            |            |            | TOTAL |
|----------------------|------------------------------------------------------|------------|------------|------------|------------|-------------------------|------------|------------|------------|------------|-------------------------------------|------------|------------|------------|------------|-------|
|                      | 253 Equivalent residue ►<br>272 Equivalent residue ► | Asp<br>Glu | His<br>Glu | Glu<br>Glu | Glu<br>Val | Glu<br>all <sup>†</sup> | Glu<br>all | Asp<br>Pro | all<br>all | Glu<br>all | all<br>all                          | all<br>Glu | all<br>Asp | all<br>Pro | all<br>Val |       |
| <i>Firmicutes</i>    | -                                                    | -          | -          | -          | -          | -                       | -          | -          | -          | 2          | 2                                   | 2          | 297        | 3          | -          | 304   |
| <i>Cyanobacteria</i> | -                                                    | -          | -          | -          | -          | -                       | -          | -          | -          | -          | -                                   | 123        | -          | -          | -          | 123   |
| <i>Alveolata</i>     | 5                                                    | 20         | -          | -          | -          | 8                       | -          | -          | -          | -          | -                                   | 4          | -          | -          | -          | 37    |
| <i>Stramenopiles</i> | 10                                                   | 20         | 1          | -          | -          | -                       | -          | -          | -          | -          | -                                   | 15         | -          | -          | -          | 46    |
| <i>Rhodophyta</i>    | -                                                    | 8          | -          | -          | -          | -                       | -          | -          | -          | -          | -                                   | 6          | -          | -          | -          | 14    |
| <i>Viridiplantae</i> | -                                                    | 80         | -          | -          | -          | -                       | 2          | -          | -          | -          | -                                   | 276        | -          | -          | -          | 358   |

- represents zero. <sup>†</sup> Other amino acid residues than what is denoted in either the 253<sup>rd</sup> or the 272<sup>nd</sup> position.

Note: the number of cyt *b<sub>c1</sub>* and cyt *b<sub>6f</sub>* complexes has no strict correspondence, since not all the organelle genomes of the same species were subjected to sequencing.

Supplementary Table S 3: Cyt b from the mitochondrial clades

| Abbreviation | Qo-motif | 253 <sup>rd</sup> residue | Accession Number | Kingdom (Superphylum)      | Organism                                             |
|--------------|----------|---------------------------|------------------|----------------------------|------------------------------------------------------|
| Pseak        | PEWY     | H                         | YP_025795        | Viridiplantae              | <i>Pseudodoclonium akinetum</i>                      |
| Fucve        | PEWY     | E                         | YP_448625        | Stramenopiles              | <i>Fucus vesiculosus</i>                             |
| Naegr        | PEWY     | H                         | NP_066512        | Heterolobosea <sup>a</sup> | <i>Naegleria gruberi</i>                             |
| Plavi        | PEWY     | H                         | YP_272128        | Alveolata                  | <i>Plasmodium vivax</i> Sal-1                        |
| Thepa        | PEWY     | D                         | YP_001994287     | Alveolata                  | <i>Theileria parva</i>                               |
| Babmi        | PEWY     | D                         | YP_007024786     | Alveolata                  | <i>Babesia microti</i>                               |
| Sacce        | PEWY     | H                         | NP_009315        | Fungi                      | <i>Saccharomyces cerevisiae</i> S288c                |
| Marbr        | PEWY     | D                         | YP_004842018     | Fungi                      | <i>Marssonina brunnea</i> f. sp. 'multigermtubi'     |
| Cryne        | PEWY     | H                         | YP_006883709     | Fungi                      | <i>Cryptococcus neoformans</i> var. grubbii H99      |
| Agasp        | PEWY     | D                         | YP_665494        | Metazoa                    | <i>Agamermis</i> sp. BH-2006 (nematode)              |
| Ampqu        | PEWY     | D                         | YP_001031207     | Metazoa                    | <i>Amphimedon queenslandica</i> (desmosponge)        |
| Apime        | PEWY     | D                         | NP_008093        | Metazoa                    | <i>Apis mellifera</i> ligustica (common honey bee)   |
| Bahja        | PEWY     | D                         | YP_007026918     | Metazoa                    | <i>Bahadzia jaraguensis</i> (amphipod)               |
| Bruama       | PEWY     | D                         | NP_694907        | Metazoa                    | <i>Brugia malayi</i> (agent of lymphatic filariasis) |
| Clacl        | PEWY     | D                         | YP_007890326     | Metazoa                    | <i>Clathrina clathrus</i>                            |
| Crair        | PEWY     | D                         | YP_003541100     | Metazoa                    | <i>Crassostrea iredalei</i> (tropical oyster)        |
| Dugja        | PEWY     | D                         | YP_004936148     | Metazoa                    | <i>Dugesia japonica</i>                              |
| Echtr        | PEWY     | D                         | YP_007183134     | Metazoa                    | <i>Echinorhynchus truttae</i> (thorny-headed worm)   |
| Entve        | PEWY     | D                         | YP_002261318     | Metazoa                    | <i>Enterobius vermicularis</i> (human pinworm)       |
| Halro        | PEWY     | D                         | NP_038246        | Metazoa                    | <i>Halocynthia roretzi</i> (sea squirt)              |
| Hiaar        | PEWY     | D                         | YP_784020        | Metazoa                    | <i>Hiatella arctica</i> (arctic hiatella)            |
| Lepsa        | PEWY     | D                         | YP_271856        | Metazoa                    | <i>Lepeophtheirus salmonis</i> (salmon louse)        |

<sup>a</sup> Class.

| Abbreviation | Qo-motif | 253 <sup>rd</sup> equiv. residue | Accession Number | Kingdom (Superphylum) | Organism                                                           |
|--------------|----------|----------------------------------|------------------|-----------------------|--------------------------------------------------------------------|
| Machi        | PEWY     | D                                | YP_007183167     | Metazoa               | <i>Macracanthorhynchus hirudinaceus</i> (giant thorny-headed worm) |
| Mnele        | PDWF     | E                                | YP_004927442     | Metazoa               | <i>Mnemiopsis leidyi</i> (sea walnut)                              |
| Mytca        | PEWY     | N                                | YP_004842037     | Metazoa               | <i>Mytilus californianus</i> (California mussel)                   |
| Neoa         | PEWY     | D                                | YP_073318        | Metazoa               | <i>Neomaskellia andropogonis</i> (sugarcane whitefly)              |
| Parwe        | PEWY     | D                                | NP_059460        | Metazoa               | <i>Paragonimus westermani</i> (lung fluke)                         |
| Parel        | PEWY     | D                                | YP_006234167     | Metazoa               | <i>Paratennoides elongatus</i> (pseudoscorpion)                    |
| Pinma        | PEWY     | E                                | YP_006883014     | Metazoa               | <i>Pinctada mazima</i> (silver-lipped pearl oyster)                |
| Plang        | PEWY     | D                                | YP_272043        | Metazoa               | <i>Placopecten magellanicus</i> (sea scallop)                      |
| Pogvi        | PEWY     | E                                | YP_220666        | Metazoa               | <i>Pogona vitticeps</i> (central bearded dragon)                   |
| Polha        | PEWY     | L                                | YP_004891181     | Metazoa               | <i>Polylabris halichoeres</i> (parasitic flatworm)                 |
| Pravu        | PEWY     | D                                | YP_007507205     | Metazoa               | <i>Pratylenchus vulnus</i> (walnut meadow nematode)                |
| Pseba        | PEWY     | D                                | YP_006234176     | Metazoa               | <i>Pseudogarypus banksi</i> (pseudoscorpion)                       |
| Pytmo        | PEWY     | E                                | YP_004733497     | Metazoa               | <i>Python molurus</i> molurus (Indian python)                      |
| Radi         | PEWY     | D                                | YP_003204886     | Metazoa               | <i>Radopholus similis</i> (banana-root nematode)                   |
| Rhaco        | PEWY     | D                                | YP_004581444     | Metazoa               | <i>Rhabdopleura compacta</i> (hemichordate)                        |
| Rotro        | PEWY     | D                                | YP_003331189     | Metazoa               | <i>Rotaria rotatoria</i> (rotifer)                                 |
| Rudph        | PEWY     | D                                | NP_543037        | Metazoa               | <i>Ruditapes philippinarum</i> (Japanese littleneck clam)          |
| Scabr        | PEWY     | D                                | YP_007627191     | Metazoa               | <i>Scapharca broughtonii</i>                                       |
| Tetur        | PEWY     | A                                | YP_001795379     | Metazoa               | <i>Tetranychus urticae</i> (two-spotted spider mite)               |
| Trisp        | PEWY     | D                                | NP_077260        | Metazoa               | <i>Trichinella spiralis</i> (trichinosis nematode)                 |
| Xipam        | PEWY     | D                                | YP_025922        | Metazoa               | <i>Xiphinema americanum</i> (American dagger nematode)             |

Supplementary Table S 4: Cyt *b* from the proteobacterial clades.

| Abbreviation | Qo-motif | 253 <sup>rd</sup> equiv. residue | Fused cyt <i>c</i> ? | Accession Number | Class                      | Organism                                                     |
|--------------|----------|----------------------------------|----------------------|------------------|----------------------------|--------------------------------------------------------------|
| Hydsp        | PEWY     | P                                |                      | ZP_02177717      | Aquificae                  | <i>Hydrogenivirga</i> sp. 128-5-R1-1                         |
| Acepa        | PEWY     | E                                |                      | ZP_16286000      | $\alpha$ -Proteobacteria   | <i>Acetobacter pasteurianus</i> subsp. pasteurianus LMG 1262 |
| Barta        | PEWY     | H                                |                      | ZP_10466437      | $\alpha$ -Proteobacteria   | <i>Bartonella tamiae</i> Th239                               |
| Hodci        | PEWY     | N                                |                      | YP_003038798     | $\alpha$ -Proteobacteria   | <i>Candidatus</i> Hodgkinia cicadicola Dsem                  |
| Jansp        | PEWY     | H                                |                      | YP_508268        | $\alpha$ -Proteobacteria   | <i>Jannaschia</i> sp. CCS1                                   |
| Ketvu        | PEWY     | H                                |                      | YP_003965199+200 | $\alpha$ -Proteobacteria   | <i>Ketogulonicigenium vulgare</i> Y25                        |
| Magsp        | PEWY     | E                                | true                 | ZP_23004544      | $\alpha$ -Proteobacteria   | <i>Magnetospirillum</i> sp. SO-1                             |
| Rhovu        | PEWY     | H                                | true                 | ZP_10898046      | $\alpha$ -Proteobacteria   | <i>Rhodovulum</i> sp. PH10                                   |
| Zymmo        | PEWY     | D                                |                      | YP_004661509     | $\alpha$ -Proteobacteria   | <i>Zymomonas mobilis</i> subsp. pomaceae ATCC 29192          |
| Burce        | PVWY     | E                                |                      | ZP_04939832      | $\beta$ -Proteobacteria    | <i>Burkholderia cenocepacia</i> PC184                        |
| Acdfe        | PPWY     | E                                |                      | YP_002220760     | $\gamma$ -Proteobacteria   | <i>Acidithiobacillus ferrooxidans</i> ATCC 53993             |
| Aliag        | PVWY     | E                                |                      | ZP_10351680      | $\gamma$ -Proteobacteria   | <i>Alishewanella agri</i> BL06                               |
| Citsp        | PEWY     | S                                |                      | ZP_04561410      | $\gamma$ -Proteobacteria   | <i>Citrobacter</i> sp. 30_2                                  |
| Sacde        | PVWY     | E                                | true                 | YP_528630        | $\gamma$ -Proteobacteria   | <i>Saccharophagus degradans</i> 2-40                         |
| Vibch        | PVWY     | E                                |                      | ZP_01678359+50   | $\gamma$ -Proteobacteria   | <i>Vibrio cholerae</i> 2740-80                               |
| Marga        | PVWY     | E                                | true                 | ZP_01617541      | $\gamma$ -Proteobacteria   | marine gamma proteobacterium HTCC2143                        |
| Geosu        | PEWY     | F                                |                      | NP_952700        | $\delta$ -Proteobacteria   | <i>Geobacter sulfurreducens</i> PCA                          |
| Nitsp        | PEWY     | D                                |                      | YP_001357048     | $\epsilon$ -Proteobacteria | <i>Nitratiruptor</i> sp. SB155-2                             |
| Sulde        | PEWY     | F                                |                      | YP_003303190     | $\epsilon$ -Proteobacteria | <i>Sulfurospirillum deleyianum</i> DSM 6946                  |

NOTE.—The “+” sign within the accession number of NCBI RefSeq database indicates that the cyt *b* homolog was concatenated from the two accession numbers of sequences of the N- and C-terminal regions.

Supplementary Table S 5: Cyt *b* from clades comprising of photosynthetic organisms.

| Abbreviation | Qo-motif | heme <i>c</i> <sub>1</sub> motif | Accession Number  | Phylum/ Class           | Organism                                             |
|--------------|----------|----------------------------------|-------------------|-------------------------|------------------------------------------------------|
| Desha        | PDWY     | FCFGG                            | ZP_17060832+33    | Firmicutes/ Clostridia  | <i>Desulfitobacterium hafniense</i> DP7              |
| Helmo        | PEWY     | YCLGG                            | YP_001679865+66   | Firmicutes/ Clostridia  | <i>Heliobacterium modesticaldum</i> Ice1             |
| Abbreviation | Qo-motif | heme <i>c</i> <sub>1</sub> motif | Accession Number  | Phylum                  | Organism                                             |
| Calab_E      | PEWY     |                                  | ZP_09551543       | (unclassified)          | <i>Caldithrix abyssi</i> DSM 13497                   |
| Selmo        | PERH     |                                  | XP_002993891+92   | Streptophyta            | <i>Selaginella moellendorffii</i>                    |
| Chire        | PEWY     | YCIGG                            | NP_958365+59      | Chlorophyta             | chloroplast <i>Chlamydomonas reinhardtii</i>         |
| Chrve        | PEWY     | YCLGG                            | YP_003795329+5262 | Alveolata/ Chromerida   | chloroplast <i>Chromera velia</i>                    |
| Abbreviation | Qo-motif | heme <i>c</i> <sub>1</sub> motif | Accession Number  | Phylum                  | Organism                                             |
| Chlph        | PEWY     |                                  | YP_001960378      | Chlorobi                | <i>Chlorobium phaeobacteroides</i> BS1               |
| Chlth_E1     | PEWY     |                                  | YP_004862186      | Acidobacteria           | <i>Candidatus</i> Chloracidobacterium thermophilum B |
| Metox_E      | PEWY     |                                  | YP_003205722      | candidate division NC10 | <i>Candidatus</i> Methylomirabilis oxyfera           |

NOTE.—The “+” sign within the accession number of NCBI RefSeq database indicates that the cyt *b* homolog was concatenated from the two accession numbers of sequences of the N- and C-terminal regions.

Supplementary Table S 6: Cyt *b* from the PEWY-cyt *c* clade and PDWY-cyt *c* clade.

| Abbreviation | Qo-motif | heme <i>c<sub>i</sub></i><br>motif | Fused<br>cyt <i>c</i> ? | Accession Number | Phylum/ Class                   | Organism                                             |
|--------------|----------|------------------------------------|-------------------------|------------------|---------------------------------|------------------------------------------------------|
| Bresp        | PDWY     | YCFGG                              | true                    | ZP_10742446+45   | Firmicutes/ Bacilli             | <i>Brevibacillus</i> sp. CF112                       |
| Dessp        | PDWY     | YCFGG                              | true                    | ZP_08462740+41   | Firmicutes/ Bacilli             | <i>Desmospora</i> sp. 8437                           |
| Hallo        | PDWY     | YCFGG                              | true                    | YP_006180888+87  | Firmicutes/ Bacilli             | <i>Halobacillus halophilus</i> DSM 2266              |
| Kyrtu        | PDWY     | YCFGG                              | true                    | YP_003589550+49  | Firmicutes/ Bacilli             | <i>Kyrtidia tusciae</i> DSM 2912                     |
| Macca        | PDWY     | YCFGG                              | true                    | YP_002560515+14  | Firmicutes/ Bacilli             | <i>Macrococcus caseolyticus</i> JCSC5402             |
| Paeel        | PDWY     | YCFGG                              | true                    | ZP_09079292+93   | Firmicutes/ Bacilli             | <i>Paenibacillus elgii</i> B69                       |
| Cloul        | PDWY     | YCFGG                              | true                    | ZP_23165745+44   | Firmicutes/ Clostridia          | <i>Clostridium ultunense</i> Esp                     |
| Desac        | PAWY     | YCFGG                              | true                    | YP_006465273     | Firmicutes/ Clostridia          | <i>Desulfosporosinus acidiphilus</i> SJ4             |
| Theye        | PEWY     | YCFGG                              | true                    | YP_002248983+84  | Nitrospirae                     | <i>Thermodesulfobivrio yellowstonii</i> DSM 11347    |
| Acica        | PDFP     |                                    | true                    | YP_002755480     | Acidobacteria                   | <i>Acidobacterium capsulatum</i> ATCC 51196          |
| Gratu        | PDFA     |                                    | true                    | YP_004217982     | Acidobacteria                   | <i>Gramulicella tundricola</i> MP5ACTX9              |
| Zumpr        | PDWY     |                                    | true                    | YP_003583939     | Bacteroidetes                   | <i>Zunongwangia profunda</i> SM-A87                  |
| Blama_D      | PDWY     |                                    | true                    | ZP_01094311      | Planctomycetes                  | <i>Blastopirellula marina</i> DSM 3645               |
| Plama_D      | PDWY     |                                    | true                    | ZP_01854221      | Planctomycetes                  | <i>Planctomyces maris</i> DSM 8797                   |
| Opite        | PDWY     |                                    | true                    | YP_001820421     | Verrucomicrobia                 | <i>Opitutus terrae</i> PB90-1                        |
| Tersa        | PEWY     |                                    | true                    | YP_004182035     | Acidobacteria                   | <i>Terriglobus saanensis</i> SPIPR4                  |
| Chlth_E2     | PEWY     |                                    | true                    | YP_004862044     | Acidobacteria                   | Candidatus <i>Chloracidobacterium thermophilum</i> B |
| Solus_E      | PEWY     |                                    | true                    | YP_S27419        | Acidobacteria                   | Candidatus <i>Solibacter usitatus</i> Ellin6076      |
| Patsp        | PEWY     |                                    | true                    | ZP_09470202+03   | Actinobacteria/ Rubrobacteridae | <i>Patulibacter</i> sp. I11                          |
| Rubxy        | PEWF     |                                    | true                    | YP_645679+78     | Actinobacteria/ Rubrobacteridae | <i>Rubrobacter xylanophilus</i> DSM 9941             |
| Desti_E      | PEWY     |                                    | true                    | YP_006446863     | $\delta$ -Proteobacteria        | <i>Desulfomonile tiedjei</i> DSM 6799                |
| Plepa        | PEWY     |                                    | true                    | ZP_01912028      | $\delta$ -Proteobacteria        | <i>Plesiocystis pacifica</i> SIR-1                   |
| Gemau        | PEWY     |                                    | true                    | YP_002760208     | Gemmatimonadetes                | <i>Gemmatimonas aurantiaca</i> T-27                  |
| Nitde.E1     | PEWY     |                                    | true                    | YP_003796589     | Nitrospirae                     | <i>Candidatus Nitrospira defluvii</i>                |
| Nitde.E2     | PEWY     |                                    | true                    | YP_003799486     | Nitrospirae                     | <i>Candidatus Nitrospira defluvii</i>                |
| Lepfe_E      | PAWY     |                                    | true                    | YP_005469368     | Nitrospirae                     | <i>Leptospirillum ferrooxidans</i> C2-3              |
| Blama_E      | PEWY     |                                    | true                    | ZP_01090199      | Planctomycetes                  | <i>Blastopirellula marina</i> DSM 3645               |
| Isopa        | PEWY     |                                    | true                    | YP_004179079     | Planctomycetes                  | <i>Isosphaera pallida</i> ATCC 43644                 |
| Pirst        | PEWY     |                                    | true                    | YP_003372364     | Planctomycetes                  | <i>Pirellula staleyii</i> DSM 6068                   |
| Plama_E      | PEWF     |                                    | true                    | ZP_01856609      | Planctomycetes                  | <i>Planctomyces maris</i> DSM 8797                   |
| Schpa_E1     | PEWY     |                                    | true                    | ZP_11092181      | Planctomycetes                  | <i>Schlesneria paludicola</i> DSM 18645              |
| Schpa_E2     | PEWY     |                                    | true                    | ZP_11091336      | Planctomycetes                  | <i>Schlesneria paludicola</i> DSM 18645              |
| PlaKS_E      | PEWY     |                                    | true                    | ZP_10101269      | Planctomycetes                  | <i>planctomycete KSU-1</i>                           |

NOTE.—The “+” sign within the accession number of NCBI RefSeq database indicates that the cyt *b* homolog was concatenated from the two accession numbers of sequences of the N- and C-terminal regions.

Supplementary Table S 7: Cyt *b* from the APWY clade.

| Abbreviation | Qo-motif | heme <i>c<sub>i</sub></i> motif | Accession Number | Phylum/ Class                    | Organism                                            |
|--------------|----------|---------------------------------|------------------|----------------------------------|-----------------------------------------------------|
| Solus_P      | APWY     |                                 | YP_825633+32     | Acidobacteria                    | <i>Candidatus</i> Solibacter usitatus Ellin6076     |
| Iluco        | APWY     | LCLGG                           | YP_007562653+54  | Actinobacteria/ Acidimicrobiales | <i>Ilumatobacter coccineum</i> YM16-304             |
| Anasp        | APWY     |                                 | ZP_09484367      | Bacteroidetes                    | <i>Anaerophaga</i> sp. HS1                          |
| Wadch        | APWY     |                                 | YP_003710306     | Chlamydiae                       | <i>Waddlia chondrophila</i> WSU 86-1044             |
| Calae        | APWY     |                                 | YP_005441946     | Chloroflexi                      | <i>Caldilinea aerophila</i> DSM 14535 = NBRC 104270 |
| Herai        | APWY     |                                 | YP_001547012     | Chloroflexi                      | <i>Herpetosiphon aurantiacus</i> DSM 785            |
| Ktera        | APWY     | WCMGG                           | ZP_06967906+05   | Chloroflexi                      | <i>Ktedonobacter racemifer</i> DSM 44963            |
| Osctr        | AAWY     |                                 | ZP_07687042      | Chloroflexi                      | <i>Oscillochloris trichoides</i> DG-6               |
| Anesp        | APWY     |                                 | YP_002133819     | $\delta$ -Proteobacteria         | <i>Anaeromyxobacter</i> sp. K                       |
| Desti_P      | APWY     |                                 | YP_006445645     | $\delta$ -Proteobacteria         | <i>Desulfomonile tiedjei</i> DSM 6799               |
| Desph        | APWF     |                                 | ZP_24025636      | $\delta$ -Proteobacteria         | <i>Desulfotignum phosphitoidans</i> DSM 13687       |
| Desde        | APWY     |                                 | YP_005166714     | $\delta$ -Proteobacteria         | <i>Desulfovibrio desulfuricans</i> ND132            |
| Geoda        | APWY     |                                 | YP_002535600+599 | $\delta$ -Proteobacteria         | <i>Geobacter daltonii</i> FRC-32                    |
| Thema        | APWY     |                                 | YP_004101177+176 | Firmicutes/ Clostridia           | <i>Thermaerobacter marianensis</i> DSM 12885        |
| Metox_P      | APWY     |                                 | YP_003205672     | candidate division NC10          | <i>Candidatus</i> Methyloirabilis oxyfera           |
| Lepfe_P      | APWY     | FCLGG                           | YP_005468543+44  | Nitrospirae                      | <i>Leptospirillum ferrooxidans</i> C2-3             |
| Blama_P      | APWY     | WCMGG                           | ZP_01091114+15   | Planctomycetes                   | <i>Blastopirellula marina</i> DSM 3645              |
| Schpa_P      | APWY     | WCMGG                           | ZP_11096294+93   | Planctomycetes                   | <i>Schlesmeria paludicola</i> DSM 18645             |
| Sinac        | APWY     | WCMGG                           | YP_007201890+91  | Planctomycetes                   | <i>Singulisphaera acidiphila</i> DSM 18658          |
| PlaKS_P      | APWY     | WCMGG                           | ZP_10098673+70   | Planctomycetes                   | <i>planctomycete</i> KSU-1                          |

NOTE.-The “+” sign within the accession number of NCBI RefSeq database indicates that the cyt *b* homolog was concatenated from the two accession numbers of sequences of the N- and C-terminal regions.



**Supplementary Table S 8:** Cyt *b* from the GPWY clade and PDWF-FeS clade.

| Abbreviation | Qo-motif | Accession    | Phylum/ Class            | Organism                                  |
|--------------|----------|--------------|--------------------------|-------------------------------------------|
| Magma        | PDWY     | YP_421588    | $\alpha$ -Proteobacteria | <i>Magnetospirillum magneticum</i> AMB-1  |
| Alide        | PDWF     | YP_004128218 | $\beta$ -Proteobacteria  | <i>Alicycliphilus denitrificans</i> BC    |
| Turpa        | PDWF     | YP_006440259 | Spirochaetes             | <i>Turneriella parva</i> DSM 21527        |
| Calab_P      | GPWY     | ZP_09550388  | (unclassified)           | <i>Caldithrix abyssi</i> DSM 13497        |
| Despr        | GPWF     | YP_004195969 | $\delta$ -Proteobacteria | <i>Desulfobulbus propionicus</i> DSM 2032 |
| Dessu        | GPWF     | YP_007468775 | $\delta$ -Proteobacteria | <i>Desulfocapsa sulfexigens</i> DSM 10523 |
| Ignal        | GPWY     | YP_005846642 | Ignavibacteria           | <i>Ignavibacterium album</i> JCM 16511    |
| Melro        | GPWY     | YP_006528019 | Ignavibacteria           | <i>Melioribacter roseus</i> P3M           |
| Nit'gr       | PPWQ     | ZP_21929800  | Nitrospinae              | <i>Nitrospina gracilis</i> 3/211          |

**Supplementary Table S 9:** Cyt *b* from the Halobacteria, Actinobacteria and Deinococcus-Thermus clades.

| Abbreviation | Qo-motif | Accession Number | Phylum/ Class                    | Organism                                           |
|--------------|----------|------------------|----------------------------------|----------------------------------------------------|
| Acife        | PDWY     | YP_003110412     | Actinobacteria/ Acidimicrobiae   | <i>Acidimicrobium ferrooxidans</i> DSM 10331       |
| Ausch        | PDWY     | ZP_10950869      | Actinobacteria/ Actinobacteridae | <i>Austwickia chelonae</i> NBRC 105200             |
| Blasa        | PDWY     | YP_005329981     | Actinobacteria/ Actinobacteridae | <i>Blastococcus saxosidens</i> DD2                 |
| Micte        | PDWY     | YP_004222922     | Actinobacteria/ Actinobacteridae | <i>Microbacterium testaceum</i> StLB037            |
| Proac        | PDWY     | YP_006980403     | Actinobacteria/ Actinobacteridae | <i>Propionibacterium acidipropionici</i> ATCC 4875 |
| Rhoco        | PDFY     | ZP_21137794      | Actinobacteria/ Actinobacteridae | <i>Rhodococcus</i> sp. AW25M09                     |
| Strsp        | PDWY     | ZP_06712394      | Actinobacteria/ Actinobacteridae | <i>Streptomyces</i> sp. e14                        |
| Deipe        | PDWY     | YP_007180097     | Deinococcus-Thermus/ Deinococci  | <i>Deinococcus perariditatoris</i> DSM 19664       |
| Deira        | PDWY     | NP_294159        | Deinococcus-Thermus/ Deinococci  | <i>Deinococcus radiodurans</i> R1                  |
| Meiru        | PDWY     | YP_003506041     | Deinococcus-Thermus/ Deinococci  | <i>Meiothermus ruber</i> DSM 1279                  |
| Meisi        | PDWY     | YP_003683913     | Deinococcus-Thermus/ Deinococci  | <i>Meiothermus sibiricus</i> DSM 9946              |
| Halha        | PAWF     | ZP_11270956      | Euryarchaeota/ Halobacteria      | <i>Halococcus hamelinensis</i> 100A6               |
| Halsp        | PDWF     | ZP_21626402      | Euryarchaeota/ Halobacteria      | <i>Haloferax</i> sp. ATCC BAA-646                  |
| Halvo        | PDWF     | YP_003533243     | Euryarchaeota/ Halobacteria      | <i>Haloferax volcanii</i> DS2                      |
| Halut        | PDWY     | YP_003129498+97  | Euryarchaeota/ Halobacteria      | <i>Halorhabdus utahensis</i> DSM 12940             |
| Halla        | PDWF     | YP_002565995     | Euryarchaeota/ Halobacteria      | <i>Halorubrum lacusprofundi</i> ATCC 49239         |
| Halca        | PDWF     | ZP_21576115      | Euryarchaeota/ Halobacteria      | <i>Halosimplex carlsbadense</i> 2-9-1              |

NOTE.-The “+” sign within the accession number of NCBI RefSeq database indicates that the cyt *b* homolog was concatenated from the two accession numbers of sequences of the N- and C-terminal regions.

Supplementary Table S 10: Cyt *b* from the archaeal clades.

| Abbreviation | Qo-motif | Accession Number | Phylum/Class (Order)             | Organism                                       |
|--------------|----------|------------------|----------------------------------|------------------------------------------------|
| Censy        | PEWY     | YP_874958        | Thaumarchaeota/ Crenarchaeales   | <i>Cenarchaeum symbiosum</i> A                 |
| Nitma        | PEWY     | YP_001582877     | Thaumarchaeota/ Nitrososumilales | <i>Nitrosopumilus maritimus</i> SCM1           |
| Korcr        | PEWY     | YP_001737595     | Korarchaeota                     | <i>Candidatus Korarchaeum cryptofilum</i> OPF8 |
| Pyrae        | PPWP     | NP_559242        | Crenarchaeota/ Thermoprotei      | <i>Pyrobaculum aerophilum</i> str. IM2         |
| Picto        | PDWY     | YP_023912        | Euryarchaeota/ Thermoplasmata    | <i>Picrophilus torridus</i> DSM 9790           |
| Theac        | PDWY     | NP_394678        | Euryarchaeota/ Thermoplasmata    | <i>Thermoplasma acidophilum</i> DSM 1728       |
| Thevo        | PPWF     | NP_110886        | Euryarchaeota/ Thermoplasmata    | <i>Thermoplasma volcanium</i> GSS1             |
| Aciho        | PPWF     | YP_004458829     | Crenarchaeota/ Thermoprotei      | <i>Acidianus hospitalis</i> W1                 |
| Acisa        | PDLF     | YP_003816924     | Crenarchaeota/ Thermoprotei      | <i>Acidilobus saccharovorans</i> 345-15        |
| Aerpe        | PPWF     | NP_148127        | Crenarchaeota/ Thermoprotei      | <i>Aeropyrum pernix</i> K1                     |
| Calma        | PLWF     | YP_001541746     | Crenarchaeota/ Thermoprotei      | <i>Caldivirga maquilingensis</i> IC-167        |
| Metcu        | PDWY     | YP_004410337     | Crenarchaeota/ Thermoprotei      | <i>Metallosphaera cuprina</i> Ar-4             |
| Metye        | PPWF     | ZP_09705161      | Crenarchaeota/ Thermoprotei      | <i>Metallosphaera yellowstonensis</i> MK1      |
| Sulso        | PDWY     | NP_344285        | Crenarchaeota/ Thermoprotei      | <i>Sulfolobus solfataricus</i> P2              |
| Sulto        | PPWF     | NP_375984        | Crenarchaeota/ Thermoprotei      | <i>Sulfolobus tokodaii</i> str. 7              |
| Thete        | PPWF     | YP_004892075     | Crenarchaeota/ Thermoprotei      | <i>Thermoproteus tenax</i> Kra 1               |

**Supplementary Table S 11:** Cyt *b* encoded as separate N- and C-terminal proteins in Proteobacteria

| N-terminal   | C-terminal   | Qo-motif | Clade          | Class                    | Organism                               |
|--------------|--------------|----------|----------------|--------------------------|----------------------------------------|
| YP_003965199 | YP_003965200 | PEWY     | Proteobacteria | $\alpha$ -Proteobacteria | <i>Ketogulonicigenium vulgare</i> Y25  |
| ZP_01678359  | ZP_01678350  | PVWY     | Proteobacteria | $\gamma$ -Proteobacteria | <i>Vibrio cholerae</i> 2740-80         |
| <sup>a</sup> | ZP_01957767  | PVWY     | Proteobacteria | $\gamma$ -Proteobacteria | <i>Vibrio cholerae</i> MZO-3           |
| <sup>a</sup> | ZP_01976654  | PVWY     | Proteobacteria | $\gamma$ -Proteobacteria | <i>Vibrio cholerae</i> B33             |
| <sup>a</sup> | ZP_01972814  | PVWY     | Proteobacteria | $\gamma$ -Proteobacteria | <i>Vibrio cholerae</i> NCTC 8457       |
| ZP_09225811  | ZP_09225812  | PVWY     | Proteobacteria | $\gamma$ -Proteobacteria | <i>Pseudoalteromonas</i> sp. BSi20652  |
| YP_006721080 | YP_006721081 | APWY     | Bacterial P272 | $\delta$ -Proteobacteria | <i>Geobacter metallireducens</i> GS-15 |
| ZP_12703809  | ZP_12703808  | APWY     | Bacterial P272 | $\delta$ -Proteobacteria | <i>Geobacter metallireducens</i> RCH3  |
| YP_002535600 | YP_002535599 | APWY     | Bacterial P272 | $\delta$ -Proteobacteria | <i>Geobacter</i> sp. sp. FRC-32        |

<sup>a</sup> The N-terminal polypeptide is absent in the genome.

**Supplementary Table S 12:** Rieske ISP and cyt *b* of the organisms which encode multiple copies of cyt *bc*<sub>1</sub> complexes.

| Abbreviation | Rieske    |                  | Cyt <i>b</i> |                  | Phylum/ Class           | Organism                                             |
|--------------|-----------|------------------|--------------|------------------|-------------------------|------------------------------------------------------|
|              | Signature | Accession Number | Qo-motif     | Accession Number |                         |                                                      |
| Blama_D      | G-Y       | ZP_01094312      | PDWY         | ZP_01094311      | Planctomycetes          | <i>Blastopirellula marina</i> DSM 3645               |
| Blama_E      | S-F       | ZP_01090200      | PEWY         | ZP_01090199      | Planctomycetes          | <i>Blastopirellula marina</i> DSM 3645               |
| Blama_P      | S-F       | ZP_01091113      | APWY         | ZP_01091114+15   | Planctomycetes          | <i>Blastopirellula marina</i> DSM 3645               |
| Calab_E      | G-F       | ZP_09551544      | PEWY         | ZP_09551543      | (unclassified)          | <i>Caldithrix abyssi</i> DSM 13497                   |
| Calab_P      | S-F       | ZP_09550387      | GPWY         | ZP_09550388      | (unclassified)          | <i>Caldithrix abyssi</i> DSM 13497                   |
| Chlth_E1     | G-Y       | YP_004862187     | PEWY         | YP_004862186     | Acidobacteria           | <i>Candidatus Chloracidobacterium thermophilum</i> B |
| Chlth_E2     | S-F       | YP_004862045     | PEWY         | YP_004862044     | Acidobacteria           | <i>Candidatus Chloracidobacterium thermophilum</i> B |
| Desti_E      | G-F       | YP_006446862     | PEWY         | YP_006446863     | δ-Proteobacteria        | <i>Desulfomonile tiedjei</i> DSM 6799                |
| Desti_P      | S-F       | YP_006445644     | APWY         | YP_006445645     | δ-Proteobacteria        | <i>Desulfomonile tiedjei</i> DSM 6799                |
| Lepfe_E      | S-Y       | YP_005469369     | PAWY         | YP_005469368     | Nitrospirae             | <i>Leptospirillum ferrooxidans</i> C2-3              |
| Lepfe_P      | S-Y       | YP_005468542     | APWY         | YP_005468543+44  | Nitrospirae             | <i>Leptospirillum ferrooxidans</i> C2-3              |
| Metox_E      | G-Y       | YP_003205721     | PEWY         | YP_003205722     | candidate division NC10 | <i>Candidatus Methyloimrabilis oxyfera</i>           |
| Metox_P      | S-F       | YP_003205671     | APWY         | YP_003205672     | candidate division NC10 | <i>Candidatus Methyloimrabilis oxyfera</i>           |
| Nitde_E1     | S-Y       | YP_003796588     | PEWY         | YP_003796589     | Nitrospirae             | <i>Candidatus Nitrospira defluvii</i>                |
| Nitde_E2     | S-F       | YP_003799487     | PEWY         | YP_003799486     | Nitrospirae             | <i>Candidatus Nitrospira defluvii</i>                |
| PlaKS_E      | G-F       | ZP_10101268      | PEWY         | ZP_10101269      | Planctomycetes          | <i>planctomycete</i> KSU-1                           |
| PlaKS_P      | S-F       | ZP_10098674      | APWY         | ZP_10098673+70   | Planctomycetes          | <i>planctomycete</i> KSU-1                           |
| Plama_D      | G-Y       | ZP_01854220      | PDWY         | ZP_01854221      | Planctomycetes          | <i>Planctomyces maris</i> DSM 8797                   |
| Plama_E      | A-F       | ZP_01856608      | PEWF         | ZP_01856609      | Planctomycetes          | <i>Planctomyces maris</i> DSM 8797                   |
| Schpa_E1     | S-F       | ZP_11092182      | PEWY         | ZP_11092181      | Planctomycetes          | <i>Schleseria paludicola</i> DSM 18645               |
| Schpa_E2     | A-F       | ZP_11091337      | PEWY         | ZP_11091336      | Planctomycetes          | <i>Schleseria paludicola</i> DSM 18645               |
| Schpa_P      | S-F       | ZP_11096295      | APWY         | ZP_11096294+93   | Planctomycetes          | <i>Schleseria paludicola</i> DSM 18645               |
| Solus_E      | S-F       | YP_827420        | PEWY         | YP_827419        | Acidobacteria           | <i>Candidatus Solibacter usitatus</i> Ellin6076      |
| Solus_P      | S-Y       | YP_825634        | APWY         | YP_825633+32     | Acidobacteria           | <i>Candidatus Solibacter usitatus</i> Ellin6076      |

NOTE.—The “+” sign within the accession number of NCBI RefSeq database indicates that the cyt *b* homolog was concatenated from the two accession numbers of sequences of the N- and C-terminal regions.

**Supplementary Table S 13:** Rieske and *cyt b* from the APWY clade and the GPWY clade. Sequences were sorted according to the “Rieske Signature”.

| Abbreviation | Rieske    |                  | Rieske           |          | Cyt <i>b</i>     |                                | Phylum/ Class                                       | Organism |
|--------------|-----------|------------------|------------------|----------|------------------|--------------------------------|-----------------------------------------------------|----------|
|              | Signature | Accession Number | Accession Number | Qo-motif | Accession Number | Phylum/ Class                  |                                                     |          |
| Anasp        | S-F       | ZP_09484366      | APWY             | APWY     | ZP_09484367      | Bacteroidetes                  | <i>Anaerophaga sp.</i> HSI                          |          |
| Calae        | S-F       | YP_005441947     | APWY             | APWY     | YP_005441946     | Chloroflexi                    | <i>Caldilinea aerophila</i> DSM 14535 = NBRC 104270 |          |
| Herau        | S-F       | YP_001547013     | APWY             | APWY     | YP_001547012     | Chloroflexi                    | <i>Herpetosiphon aurantiacus</i> DSM 785            |          |
| Osctr        | S-F       | ZP_07687041      | AAWY             | AAWY     | ZP_07687042      | Chloroflexi                    | <i>Oscillochloris trichoides</i> DG-6               |          |
| Metox_P      | S-F       | YP_003205671     | APWY             | APWY     | YP_003205672     | candidate division NC10        | <i>Candidatus Methyloirabilis oxyfera</i>           |          |
| Geoda        | S-F       | YP_002535598     | APWY             | APWY     | YP_002535600+599 | $\delta$ -Proteobacteria       | <i>Geobacter daltonii</i> FRC-32                    |          |
| Desde        | S-F       | YP_005166713     | APWY             | APWY     | YP_005166714     | $\delta$ -Proteobacteria       | <i>Desulfotribrio desulfuricans</i> ND132           |          |
| Desph        | S-F       | ZP_24025637      | APWF             | APWF     | ZP_24025636      | $\delta$ -Proteobacteria       | <i>Desulfotignum phosphitoridans</i> DSM 13687      |          |
| Desti_P      | S-F       | YP_006445644     | APWY             | APWY     | YP_006445645     | $\delta$ -Proteobacteria       | <i>Desulfomonile tiedjei</i> DSM 6799               |          |
| Thema        | S-F       | YP_004101175     | APWY             | APWY     | YP_004101177+176 | Firmicutes/ Clostridia         | <i>Thermaerobacter marianensis</i> DSM 12885        |          |
| Sinac        | S-F       | YP_007201889     | APWY             | APWY     | YP_007201890+91  | Planctomycetes                 | <i>Singulisphaera acidiphila</i> DSM 18658          |          |
| Blama_P      | S-F       | ZP_01091113      | APWY             | APWY     | ZP_01091114+15   | Planctomycetes                 | <i>Blastopirellula marina</i> DSM 3645              |          |
| PlaKS_P      | S-F       | ZP_10098674      | APWY             | APWY     | ZP_10098673+70   | Planctomycetes                 | <i>Planctomycete</i> KSU-1                          |          |
| Schpa_P      | S-F       | ZP_11096295      | APWY             | APWY     | ZP_11096294+93   | Planctomycetes                 | <i>Schlesneria paludicola</i> DSM 18645             |          |
| Iluco        | S-Y       | YP_007562655     | APWY             | APWY     | YP_007562653+54  | Actinobacteria/ Acidimicrobiae | <i>Ilumatobacter coccineum</i> YM16-304             |          |
| Solus_P      | S-Y       | YP_825634        | APWY             | APWY     | YP_825633+32     | Acidobacteria                  | <i>Candidatus Solibacter usitatus</i> Elin6076      |          |
| Wadch        | S-Y       | YP_003710307     | APWY             | APWY     | YP_003710306     | Chlamydiae                     | <i>Waddlia chondrophila</i> WSU 86-1044             |          |
| Ktera        | S-Y       | ZP_06967904      | APWY             | APWY     | ZP_06967906+05   | Chloroflexi                    | <i>Ktedonobacter racemifer</i> DSM 44963            |          |
| Anesp        | S-Y       | YP_002133818     | APWY             | APWY     | YP_002133819     | $\delta$ -Proteobacteria       | <i>Anaeromyxobacter sp.</i> K                       |          |
| Lepfe_P      | S-Y       | YP_005468542     | APWY             | APWY     | YP_005468543+44  | Nitrospirae                    | <i>Leptospirillum ferrooxidans</i> C2-3             |          |
| Calab_P      | S-F       | ZP_09550387      | GPWY             | GPWY     | ZP_09550388      | (unclassified)                 | <i>Caldithrix abyssi</i> DSM 13497                  |          |
| Despr        | S-F       | YP_004195968     | GPWF             | GPWF     | YP_004195969     | $\delta$ -Proteobacteria       | <i>Desulfobulbus propionicus</i> DSM 2032           |          |
| Dessu        | S-F       | YP_007468776     | GPWF             | GPWF     | YP_007468775     | $\delta$ -Proteobacteria       | <i>Desulfocapsa sulfexigens</i> DSM 10523           |          |
| Ignal        | S-F       | YP_005846643     | GPWY             | GPWY     | YP_005846642     | Ignavibacteria                 | <i>Ignavibacterium album</i> JCM 16511              |          |
| Melro        | S-Y       | YP_006528018     | GPWY             | GPWY     | YP_006528019     | Ignavibacteria                 | <i>Melioribacter roseus</i> P3M                     |          |

NOTE.—The “+” sign within the accession number of NCBI RefSeq database indicates that the *cyt b* homolog was concatenated from the two accession numbers of sequences of the N- and C-terminal regions.

**Supplementary Table S 14:** Rieske ISP and cyt *b* from the PDWY-cyt *c* clade. Sequences were sorted according to the “Rieske Signature”.

| Abbreviation | Rieske    |                  | Cyt <i>b</i> |                  | Phylum/ Class          | Organism                                          |
|--------------|-----------|------------------|--------------|------------------|------------------------|---------------------------------------------------|
|              | Signature | Accession Number | Qo-motif     | Accession Number |                        |                                                   |
| Pael         | A-Y       | ZP_09079291      | PDWY         | ZP_09079292+93   | Firmicutes/ Bacilli    | <i>Paenibacillus elgii</i> B69                    |
| Bresp        | G-Y       | ZP_10742447      | PDWY         | ZP_10742446+45   | Firmicutes/ Bacilli    | <i>Brevibacillus</i> sp. CF112                    |
| Dessp        | G-Y       | ZP_08462739      | PDWY         | ZP_08462740+41   | Firmicutes/ Bacilli    | <i>Desmospora</i> sp. 8437                        |
| Hallo        | G-Y       | YP_006180889     | PDWY         | YP_006180888+87  | Firmicutes/ Bacilli    | <i>Halobacillus halophilus</i> DSM 2266           |
| Kyrtu        | G-Y       | YP_003589551     | PDWY         | YP_003589550+49  | Firmicutes/ Bacilli    | <i>Kyripidia tusciae</i> DSM 2912                 |
| Macca        | G-Y       | YP_002560516     | PDWY         | YP_002560515+14  | Firmicutes/ Bacilli    | <i>Macrococcus caseolyticus</i> JCSC5402          |
| Cloul        | G-Y       | ZP_23165746      | PDWY         | ZP_23165745+44   | Firmicutes/ Clostridia | <i>Clostridium ultumense</i> Esp                  |
| Desac        | G-Y       | YP_006465272     | PAWY         | YP_006465273     | Firmicutes/ Clostridia | <i>Desulfosporosinus acidiphilus</i> SJ4          |
| Theye        | G-Y       | YP_002248982     | PEWY         | YP_002248983+84  | Nitrospirae            | <i>Thermodesulfovibrio yellowstonii</i> DSM 11347 |
| Acica        | G-Y       | YP_002755479     | PDFF         | YP_002755480     | Acidobacteria          | <i>Acidobacterium capsulatum</i> ATCC 51196       |
| Gratu        | G-Y       | YP_004217983     | PDFA         | YP_004217982     | Acidobacteria          | <i>Granulicella tundricola</i> MP5ACTX9           |
| Zunpr        | G-Y       | YP_003583938     | PDWY         | YP_003583939     | Bacteroidetes          | <i>Zunongwangia profunda</i> SM-A87               |
| Blama_D      | G-Y       | ZP_01094312      | PDWY         | ZP_01094311      | Planctomycetes         | <i>Blastopirellula marina</i> DSM 3645            |
| Plama_D      | G-Y       | ZP_01854220      | PDWY         | ZP_01854221      | Planctomycetes         | <i>Planctomyces maris</i> DSM 8797                |
| Opite        | G-Y       | YP_001820420     | PDWY         | YP_001820421     | Verrucomicrobia        | <i>Opitutus terrae</i> PB90-1                     |

NOTE.-The “+” sign within the accession number of NCBI RefSeq database indicates that the cyt *b* homolog was concatenated from the two accession numbers of sequences of the N- and C-terminal regions.

**Supplementary Table S 15:** Rieske ISP and cyt *b* from the Heliobacteria/ Desulfotobacteria clade, Cyanobacteria/ chloroplast clade, Chlorobi/ NC10/ Acidobacteria clade and the PEWY-cyt *c* clade. Sequences were sorted according to the “Rieske Signature”.

| Abbreviation | Rieske    |                  | Cyt <i>b</i> |                  | Phylum/ Class            | Organism                                             |
|--------------|-----------|------------------|--------------|------------------|--------------------------|------------------------------------------------------|
|              | Signature | Accession Number | Qo-motif     | Accession Number |                          |                                                      |
| Desha        | G-F       | ZP_17060831      | PDWY         | ZP_17060832+33   | Firmicutes/ Clostridia   | <i>Desulfotobacterium hafniense</i> DP7              |
| Helmo        | G-F       | YP_001679864     | PEWY         | YP_001679865+66  | Firmicutes/ Clostridia   | <i>Heliobacterium modesticaldum</i> Ice1             |
| Calab_E      | G-F       | ZP_09551544      | PEWY         | ZP_09551543      | (unclassified)           | <i>Caldithrix abyssi</i> DSM 13497                   |
| Chlre        | S-Y       | XP_001698786     | PEWY         | NP_958365+59     | Chlorophyta              | chloroplast <i>Chlamydomonas reinhardtii</i>         |
| Chlph        | A-Y       | YP_001960379     | PEWY         | YP_001960378     | Chlorobi                 | <i>Chlorobium phaeobacteroides</i> BS1               |
| Chlth_E1     | G-Y       | YP_004862187     | PEWY         | YP_004862186     | Acidobacteria            | <i>Candidatus</i> Chloracidobacterium thermophilum B |
| Metox_E      | G-Y       | YP_003205721     | PEWY         | YP_003205722     | candidate division NC10  | <i>Candidatus</i> Methylomirabilis oxyfera           |
| Tersa        | G-F       | YP_004182034     | PEWY         | YP_004182035     | Acidobacteria            | <i>Terriglobus saanensis</i> SP1PR4                  |
| Desti_E      | G-F       | YP_006446862     | PEWY         | YP_006446863     | $\delta$ -Proteobacteria | <i>Desulfomonile tiedjei</i> DSM 6799                |
| PlaKSE       | G-F       | ZP_10101268      | PEWY         | ZP_10101269      | Planctomycetes           | <i>planctomycete</i> KSU-1                           |
| Rubxy        | G-Y       | YP_645680        | PEWF         | YP_645679+78     | Rubrobacteridae          | <i>Rubrobacter xylanophilus</i> DSM 9941             |
| Patsp        | G-Y       | ZP_09470201      | PEWY         | ZP_09470202+03   | Rubrobacteridae          | <i>Patulibacter</i> sp. II1                          |
| Plama_E      | A-F       | ZP_01856608      | PEWF         | ZP_01856609      | Planctomycetes           | <i>Planctomyces maris</i> DSM 8797                   |
| Schpa_E2     | A-F       | ZP_11091337      | PEWY         | ZP_11091336      | Planctomycetes           | <i>Schlesneria paludicola</i> DSM 18645              |
| Chlth_E2     | S-F       | YP_004862045     | PEWY         | YP_004862044     | Acidobacteria            | <i>Candidatus</i> Chloracidobacterium thermophilum B |
| Solus_E      | S-F       | YP_827420        | PEWY         | YP_827419        | Acidobacteria            | <i>Candidatus</i> Solibacter usitatus Ellin6076      |
| Plepa        | S-F       | ZP_01912029      | PEWY         | ZP_01912028      | $\delta$ -Proteobacteria | <i>Plesiocystis pacifica</i> SIR-1                   |
| Gemau        | S-F       | YP_002760209     | PEWY         | YP_002760208     | Gemmatimonadetes         | <i>Gemmatimonas aurantiaca</i> T-27                  |
| Pirst        | S-F       | YP_003372363     | PEWY         | YP_003372364     | Planctomycetes           | <i>Pirellula staleyii</i> DSM 6068                   |
| Blama_E      | S-F       | ZP_01090200      | PEWY         | ZP_01090199      | Planctomycetes           | <i>Blastopirellula marina</i> DSM 3645               |
| Isopa        | S-F       | YP_004179080     | PEWY         | YP_004179079     | Planctomycetes           | <i>Isosphaera pallida</i> ATCC 43644                 |
| Schpa_E1     | S-F       | ZP_11092182      | PEWY         | ZP_11092181      | Planctomycetes           | <i>Schlesneria paludicola</i> DSM 18645              |
| Nitde_E2     | S-F       | YP_003799487     | PEWY         | YP_003799486     | Nitrospirae              | <i>Candidatus</i> Nitrospira defluvii                |
| Nitde_E1     | S-Y       | YP_003796588     | PEWY         | YP_003796589     | Nitrospirae              | <i>Candidatus</i> Nitrospira defluvii                |
| Lepfe_E      | S-Y       | YP_005469369     | PAWY         | YP_005469368     | Nitrospirae              | <i>Leptospirillum ferrooxidans</i> C2-3              |

NOTE.—The “+” sign within the accession number of NCBI RefSeq database indicates that the cyt *b* homolog was concatenated from the two accession numbers of sequences of the N- and C-terminal regions.
